# Supplementary material for: Exploration of AB3Si3 (A = Na/K/Rb/Cs) compounds under moderate pressure
Source: Royal Society of Chemistry journal article supplement (doi:10.1039/d3cp02930a), 2023-01-01
Supplement: d3cp02930a1.pdf [file d3cp02930a1.pdf]

## Supplementary Materials

### Exploration of $AB_3Si_3$ (A = Na/ K/ Rb/ Cs) Compounds under Moderate Pressure

Xiangyue Cui,<sup>a,b</sup> Miao Zhang,<sup>a,\*</sup> Lili Gao<sup>a,\*</sup>

<sup>a</sup>*Department of Physics, School of Sciences, Beihua University, Jilin 132013, China*

<sup>b</sup>*Joint Key Laboratory of the Ministry of Education, Institute of Applied Physics and Materials Engineering, University of Macau, Taipa, Macau, China*

\*Corresponding author.

E-mail: [zhangmiaolmc@126.com](mailto:zhangmiaolmc@126.com) (Miao Zhang); [gaolili000@sina.com](mailto:gaolili000@sina.com) (Lili Gao)

**Table S1.** The related materials used to compute formation energies of  $AB_3Si_3$  (A = Na/ K/ Rb/ Cs) compounds.

| Elemental materials | Space group                      | Pressure range (GPa) |
|---------------------|----------------------------------|----------------------|
| Na                  | <i>Im-3m</i>                     | 0 - 58.9             |
|                     | <i>Fm-3m</i>                     | 58.9 - 100           |
| K                   | <i>Im-3m</i>                     | 0 - 12.5             |
|                     | <i>Fm-3m</i>                     | 12.5 - 21.9          |
|                     | <i>P6<sub>3</sub>/mmc (hP4)</i>  | 21.9 - 34.2          |
|                     | <i>Pnma (oP8)</i>                | 34.2 - 45.3          |
|                     | <i>I4<sub>1</sub>/amd</i>        | 45.3 - 84.8          |
|                     | <i>Cmca</i>                      | 84.8 - 100           |
| Rb                  | <i>Im-3m</i>                     | 0 - 8.2              |
|                     | <i>Im-3m</i>                     | 8.2 - 15.1           |
|                     | <i>I4<sub>1</sub>/amd</i>        | 15.1 - 41.0          |
|                     | <i>Cmca</i>                      | 41.0 - 100           |
| Cs                  | <i>Fm-3m</i>                     | 0 - 3.6              |
|                     | <i>I4<sub>1</sub>/amd</i>        | 3.6 - 10.7           |
|                     | <i>Cmca</i>                      | 10.7 - 49.5          |
|                     | <i>P6<sub>3</sub>/mmc (dhcp)</i> | 49.5 - 100           |
| B                   | <i>R-3m</i>                      | 0 - 17.7             |
|                     | <i>Pnmm (γ-B)</i>                | 17.7 - 91.3          |
|                     | <i>Cmca (α-Ga)</i>               | 91.3 - 100           |
| Si                  | <i>Fd-3m (dia-Si)</i>            | 0 - 8.9              |
|                     | <i>Imma</i>                      | 8.9 - 40.0           |
|                     | <i>P6<sub>3</sub>/mmc (hcp)</i>  | 40.0 - 83.9          |
|                     | <i>Fm-3m</i>                     | 83.9 - 100           |

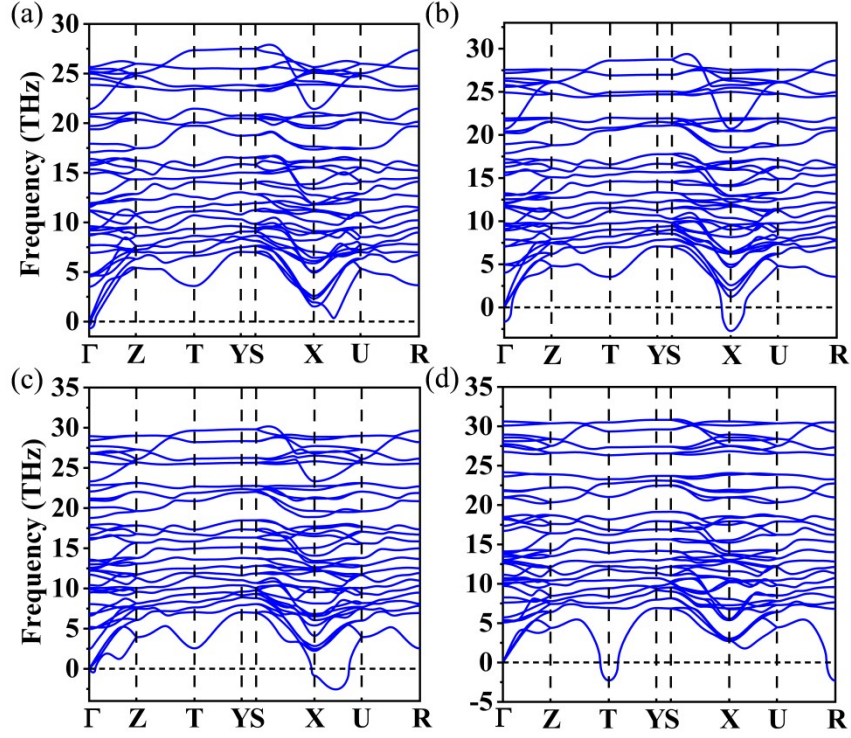

**Fig. S1** Phonon dispersion curves of  $Pmn2_1$  phase of  $NaB_3Si_3$  compound at (a) 30 GPa, (b) 40 GPa, (c) 50 GPa and (d) 60 GPa.

### Structural files

Below we provide POSCAR files for  $AB_3Si_3$  ( $A= Na / K / Rb / Cs$ ) compound calculations at ambient pressure.

#### 1. $Pmn2_1$ structure of $NaB_3Si_3$

1.0

|              |               |              |
|--------------|---------------|--------------|
| 3.1777999401 | 0.0000000000  | 0.0000000000 |
| 0.0000000000 | 12.6159000397 | 0.0000000000 |
| 0.0000000000 | 0.0000000000  | 4.1154999733 |

| Na | B | Si |
|----|---|----|
| 2  | 6 | 6  |

Direct

|             |             |             |
|-------------|-------------|-------------|
| 0.500000000 | 0.238409996 | 0.107359998 |
| 0.000000000 | 0.761590004 | 0.607360005 |
| 0.500000000 | 0.413819999 | 0.402500004 |
| 0.000000000 | 0.586179972 | 0.902500033 |
| 0.000000000 | 0.907729983 | 0.185519993 |
| 0.500000000 | 0.092270017 | 0.685519993 |
| 0.000000000 | 0.153709993 | 0.554210007 |
| 0.500000000 | 0.846289992 | 0.054210007 |
| 0.500000000 | 0.934740007 | 0.549989998 |

|             |             |             |
|-------------|-------------|-------------|
| 0.000000000 | 0.065259993 | 0.049989998 |
| 0.000000000 | 0.327080011 | 0.601149976 |
| 0.500000000 | 0.672919989 | 0.101149976 |
| 0.000000000 | 0.436010003 | 0.084729999 |
| 0.500000000 | 0.563989997 | 0.584730029 |

## 2. *C2/m* structure (primitive cell) of $\text{NaB}_3\text{Si}_3$

1.0

|               |               |              |
|---------------|---------------|--------------|
| 9.6933002472  | 0.0000000000  | 0.0000000000 |
| 8.5238555905  | 4.6156208200  | 0.0000000000 |
| -0.4809841336 | -0.1218653670 | 4.7624217992 |

|    |   |    |
|----|---|----|
| Na | B | Si |
| 2  | 6 | 6  |

Direct

|             |             |             |
|-------------|-------------|-------------|
| 0.300320029 | 0.300320029 | 0.229259998 |
| 0.699679971 | 0.699679971 | 0.770740032 |
| 0.575260043 | 0.218259990 | 0.702759981 |
| 0.781740010 | 0.424739987 | 0.297240019 |
| 0.424739987 | 0.781740010 | 0.297240019 |
| 0.218259990 | 0.575260043 | 0.702759981 |
| 0.518769979 | 0.518769979 | 0.345099986 |
| 0.481229991 | 0.481229991 | 0.654900014 |
| 0.102469981 | 0.102469981 | 0.568970025 |
| 0.897530019 | 0.897530019 | 0.431029975 |
| 0.863460004 | 0.863460004 | 0.946120024 |
| 0.136539996 | 0.136539996 | 0.053879976 |
| 0.758310020 | 0.241689980 | 0.000000000 |
| 0.241689995 | 0.758310020 | 0.000000000 |

## 3. *Imm2* structure of $\text{NaB}_3\text{Si}_3$

1.0

|              |              |              |
|--------------|--------------|--------------|
| 3.4839999676 | 0.0000000000 | 0.0000000000 |
| 0.0000000000 | 8.6724004745 | 0.0000000000 |
| 0.0000000000 | 0.0000000000 | 6.0082001686 |

|    |   |    |
|----|---|----|
| Na | B | Si |
| 2  | 6 | 6  |

Direct

|             |             |             |
|-------------|-------------|-------------|
| 0.500000000 | 0.000000000 | 0.670570016 |
| 0.000000000 | 0.500000000 | 0.170570016 |
| 0.000000000 | 0.000000000 | 0.366939992 |
| 0.500000000 | 0.500000000 | 0.866940022 |
| 0.000000000 | 0.813730001 | 0.486710012 |
| 0.000000000 | 0.186269999 | 0.486710012 |

|             |             |             |
|-------------|-------------|-------------|
| 0.500000000 | 0.313730001 | 0.986710012 |
| 0.500000000 | 0.686269999 | 0.986710012 |
| 0.000000000 | 0.000000000 | 0.040849999 |
| 0.500000000 | 0.500000000 | 0.540849984 |
| 0.000000000 | 0.238519996 | 0.830669999 |
| 0.000000000 | 0.761479974 | 0.830669999 |
| 0.500000000 | 0.738520026 | 0.330669999 |
| 0.500000000 | 0.261480004 | 0.330669999 |

#### 4. *R-3m* structure (primitive cell) of $\text{KB}_3\text{Si}_3$

1.0

|              |              |              |
|--------------|--------------|--------------|
| 7.5149002075 | 0.0000000000 | 0.0000000000 |
| 4.6972233659 | 5.8659882186 | 0.0000000000 |
| 4.6972233659 | 2.2562707263 | 5.4147077659 |

|   |   |    |
|---|---|----|
| K | B | Si |
| 2 | 6 | 6  |

Direct

|             |             |             |
|-------------|-------------|-------------|
| 0.611819983 | 0.611819983 | 0.611819983 |
| 0.388180017 | 0.388180017 | 0.388180017 |
| 0.783959985 | 0.053490002 | 0.053490002 |
| 0.216040015 | 0.946510017 | 0.946510017 |
| 0.053490002 | 0.783959985 | 0.053490002 |
| 0.946510017 | 0.216040015 | 0.946510017 |
| 0.053490002 | 0.053490002 | 0.783959985 |
| 0.946510017 | 0.946510017 | 0.216040015 |
| 0.098920003 | 0.098920003 | 0.465600014 |
| 0.901080012 | 0.901080012 | 0.534399986 |
| 0.465600014 | 0.098920003 | 0.098920003 |
| 0.534399986 | 0.901080012 | 0.901080012 |
| 0.098920003 | 0.465600014 | 0.098920003 |
| 0.901080012 | 0.534399986 | 0.901080012 |

#### 5. *R-3* structure (primitive cell) of $\text{KB}_3\text{Si}_3$

1.0

|              |              |              |
|--------------|--------------|--------------|
| 6.9670000076 | 0.0000000000 | 0.0000000000 |
| 3.7728648417 | 5.8570111826 | 0.0000000000 |
| 3.7728648417 | 2.0575409354 | 5.4837127288 |

|   |   |    |
|---|---|----|
| K | B | Si |
| 2 | 6 | 6  |

Direct

|             |             |             |
|-------------|-------------|-------------|
| 0.325199991 | 0.325199991 | 0.325199991 |
| 0.674800038 | 0.674800038 | 0.674800038 |
| 0.185900003 | 0.054790001 | 0.880330026 |

|             |             |             |
|-------------|-------------|-------------|
| 0.814100027 | 0.945209980 | 0.119669974 |
| 0.880330026 | 0.185900003 | 0.054790001 |
| 0.119669974 | 0.814100027 | 0.945209980 |
| 0.054790001 | 0.880330026 | 0.185900003 |
| 0.945209980 | 0.119669974 | 0.814100027 |
| 0.171599999 | 0.556550026 | 0.845229983 |
| 0.828400016 | 0.443449974 | 0.154770017 |
| 0.845229983 | 0.171599999 | 0.556550026 |
| 0.154770017 | 0.828400016 | 0.443449974 |
| 0.556550026 | 0.845229983 | 0.171599999 |
| 0.443449974 | 0.154770017 | 0.828400016 |

## 6. $P2_12_12_1$ structure of $KB_3Si_3$

1.0

|              |              |               |
|--------------|--------------|---------------|
| 5.2678999901 | 0.0000000000 | 0.0000000000  |
| 0.0000000000 | 5.8123002052 | 0.0000000000  |
| 0.0000000000 | 0.0000000000 | 12.0914001465 |

K    B    Si  
4    12    12

Direct

|             |             |             |
|-------------|-------------|-------------|
| 0.417070001 | 0.876479983 | 0.031789999 |
| 0.082929999 | 0.123520017 | 0.531790018 |
| 0.582929969 | 0.376479983 | 0.468210012 |
| 0.917070031 | 0.623520017 | 0.968209982 |
| 0.077689998 | 0.362610012 | 0.328550011 |
| 0.422309995 | 0.637390018 | 0.828549981 |
| 0.922309995 | 0.862609982 | 0.171449989 |
| 0.577690005 | 0.137389988 | 0.671450019 |
| 0.121560000 | 0.182640001 | 0.822239995 |
| 0.378439993 | 0.817359984 | 0.322239995 |
| 0.878440022 | 0.682640016 | 0.677760005 |
| 0.621559978 | 0.317359984 | 0.177760005 |
| 0.799939990 | 0.162570000 | 0.903180003 |
| 0.700060010 | 0.837430000 | 0.403180003 |
| 0.200060010 | 0.662570000 | 0.596819997 |
| 0.299939990 | 0.337430000 | 0.096819997 |
| 0.168369994 | 0.853389978 | 0.760529995 |
| 0.331629992 | 0.146610022 | 0.260529995 |
| 0.831629992 | 0.353389978 | 0.739470005 |
| 0.668370008 | 0.646610022 | 0.239470005 |
| 0.578869998 | 0.839529991 | 0.578660011 |
| 0.921130002 | 0.160470009 | 0.078660011 |
| 0.421130002 | 0.339529991 | 0.921339989 |
| 0.078869998 | 0.660470009 | 0.421339989 |

|             |             |             |
|-------------|-------------|-------------|
| 0.829299986 | 0.094310001 | 0.292479992 |
| 0.670700014 | 0.905690014 | 0.792479992 |
| 0.170700014 | 0.594309986 | 0.207520008 |
| 0.329299986 | 0.405690014 | 0.707520008 |

### 7. *P1* structure of $\text{RbB}_3\text{Si}_3$

1.0

|              |               |               |
|--------------|---------------|---------------|
| 5.0682001114 | 0.0000000000  | 0.0000000000  |
| 2.4743492491 | 4.5166466295  | 0.0000000000  |
| 2.3391094731 | -0.2616746290 | 10.7352033162 |

|    |   |    |
|----|---|----|
| Rb | B | Si |
| 2  | 6 | 6  |

Direct

|             |             |             |
|-------------|-------------|-------------|
| 0.836220026 | 0.831030011 | 0.397579998 |
| 0.300989985 | 0.161789998 | 0.145009995 |
| 0.117169999 | 0.178470001 | 0.512269974 |
| 0.205540001 | 0.298310012 | 0.829339981 |
| 0.555410028 | 0.325320005 | 0.830110013 |
| 0.853259981 | 0.239659995 | 0.923870027 |
| 0.867879987 | 0.577539980 | 0.931060016 |
| 0.512490034 | 0.580619991 | 0.941380024 |
| 0.035670001 | 0.810209990 | 0.013810000 |
| 0.913470030 | 0.879589975 | 0.796970010 |
| 0.254639983 | 0.806429982 | 0.607280016 |
| 0.247810006 | 0.336899996 | 0.634299994 |
| 0.714640021 | 0.332639992 | 0.632780015 |
| 0.473020017 | 0.839070022 | 0.787999988 |

### 8. *Cm* structure of $\text{CsB}_3\text{Si}_3$

1.0

|              |              |              |
|--------------|--------------|--------------|
| 6.5510001183 | 0.0000000000 | 0.0000000000 |
| 3.3770912362 | 5.6134532448 | 0.0000000000 |
| 1.3504833465 | 0.7635783005 | 5.9311572872 |

|    |   |    |
|----|---|----|
| Cs | B | Si |
| 2  | 6 | 6  |

Direct

|             |             |             |
|-------------|-------------|-------------|
| 0.475970000 | 0.475970000 | 0.972769976 |
| 0.712469995 | 0.712469995 | 0.272249997 |
| 0.947860003 | 0.227559999 | 0.635110021 |
| 0.227559999 | 0.947860003 | 0.635110021 |
| 0.192650005 | 0.192650005 | 0.055390000 |
| 0.356480002 | 0.356480002 | 0.522480011 |

|             |             |             |
|-------------|-------------|-------------|
| 0.830309987 | 0.830309987 | 0.736090004 |
| 0.967710018 | 0.967710018 | 0.824090004 |
| 0.438890010 | 0.027400000 | 0.775330007 |
| 0.027400000 | 0.438890010 | 0.775330007 |
| 0.730960011 | 0.160999998 | 0.494910002 |
| 0.160999998 | 0.730960011 | 0.494910002 |
| 0.211099997 | 0.211099997 | 0.375919998 |
| 0.011000000 | 0.011000000 | 0.141560003 |
